# Supplementary material for: Discrete and polymeric cobalt organophosphates: isolation of a 3-D cobalt phosphate framework exhibiting selective CO2capture
Source: Royal Society of Chemistry journal article supplement (doi:10.1039/c4dt03379e), 2015-01-01
Supplement: c4dt03379e1.pdf [file c4dt03379e1.pdf]

## **Supporting Information for**

# **Discrete and polymeric cobalt organophosphates: Isolation of a 3-D cobalt phosphate framework exhibiting selective CO<sub>2</sub> capture**

Sandeep K. Gupta, Subramaniam Kuppaswamy, James P. S. Walsh, Eric J. L. McInnes and  
Ramaswamy Murugavel

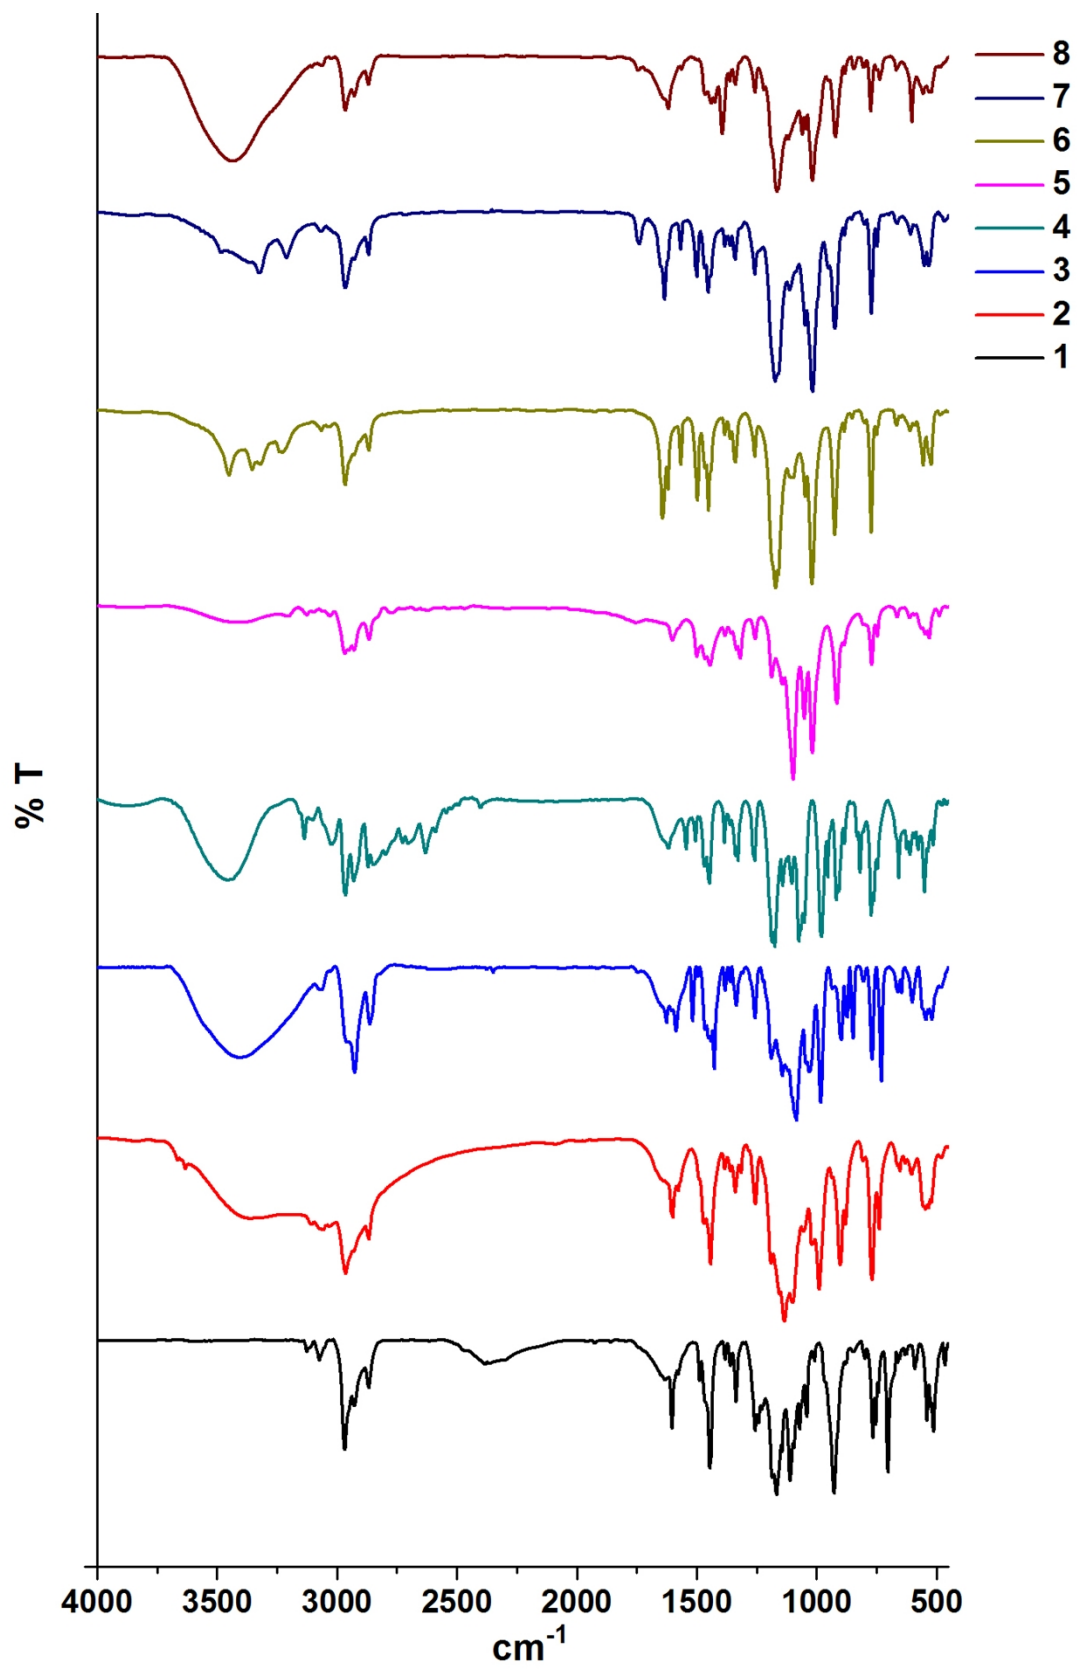

Figure S1. FT-IR spectra of compound 1-8.

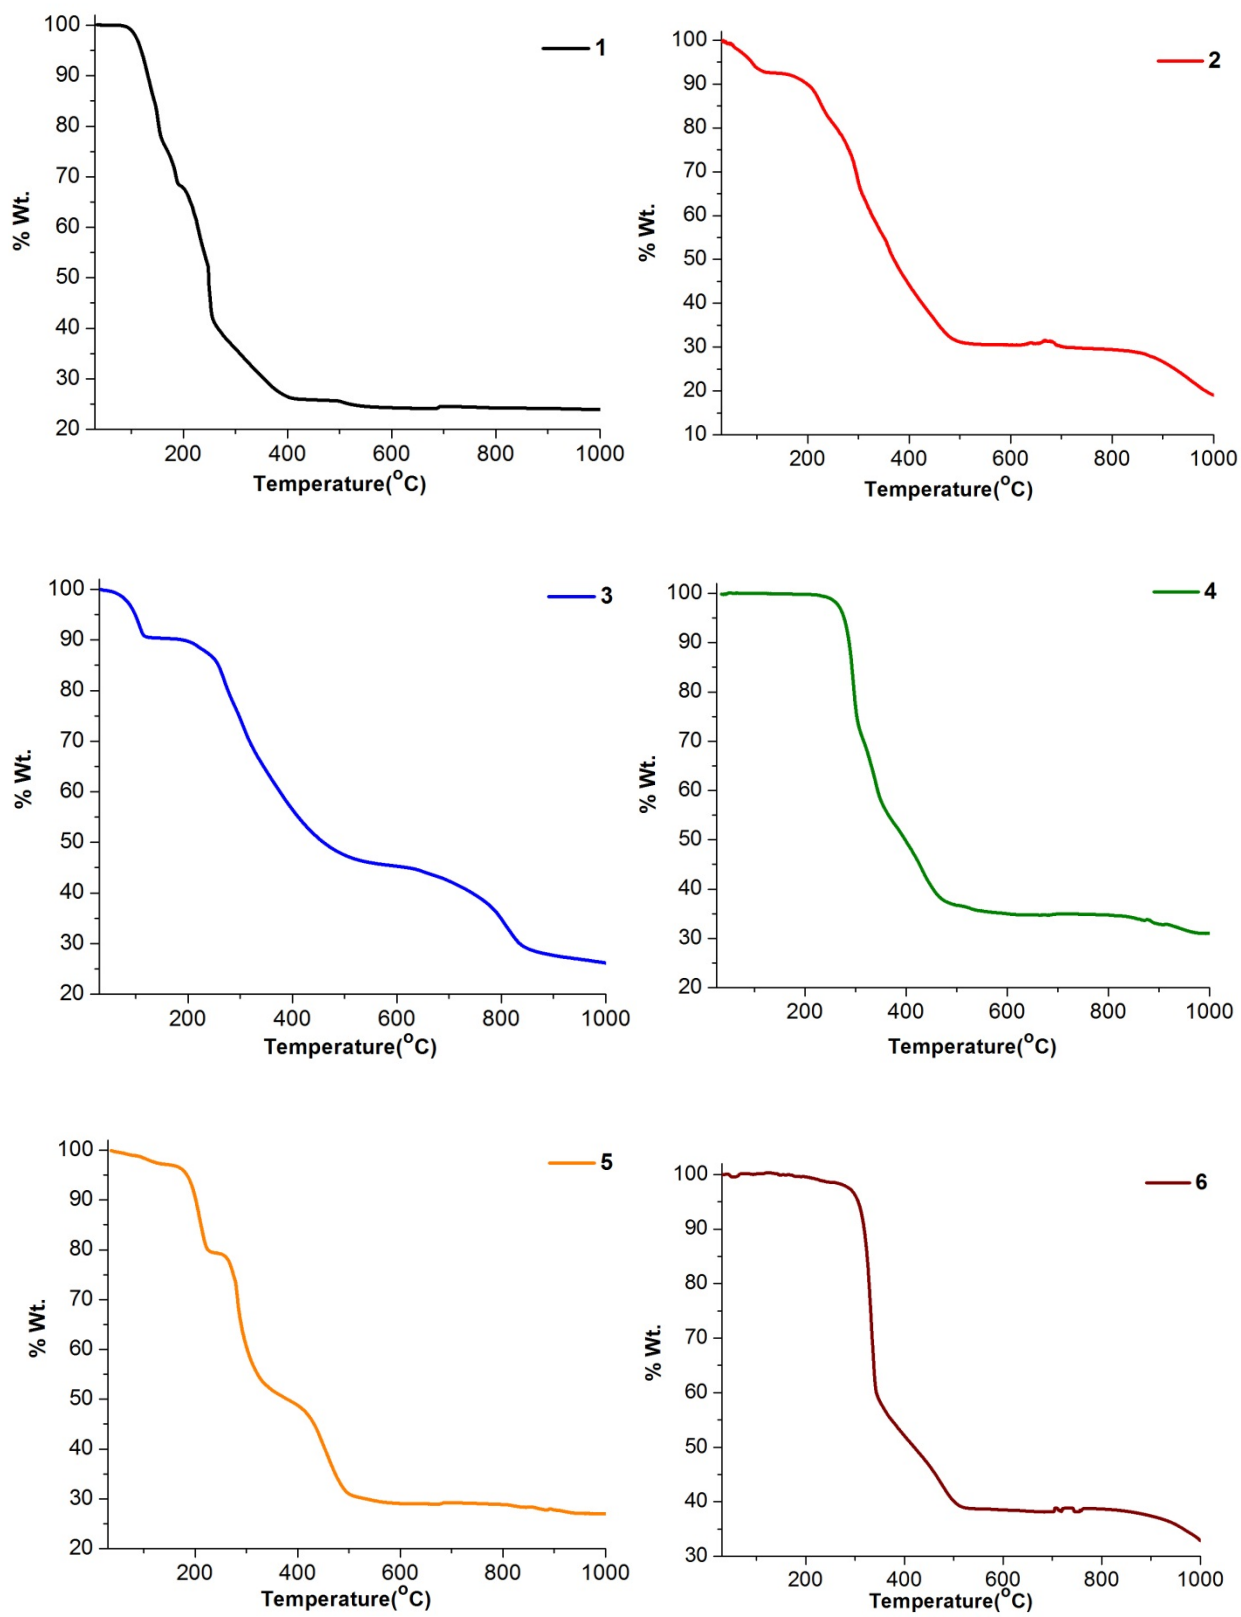

Figure S2 TGA analysis of compound 1-6.

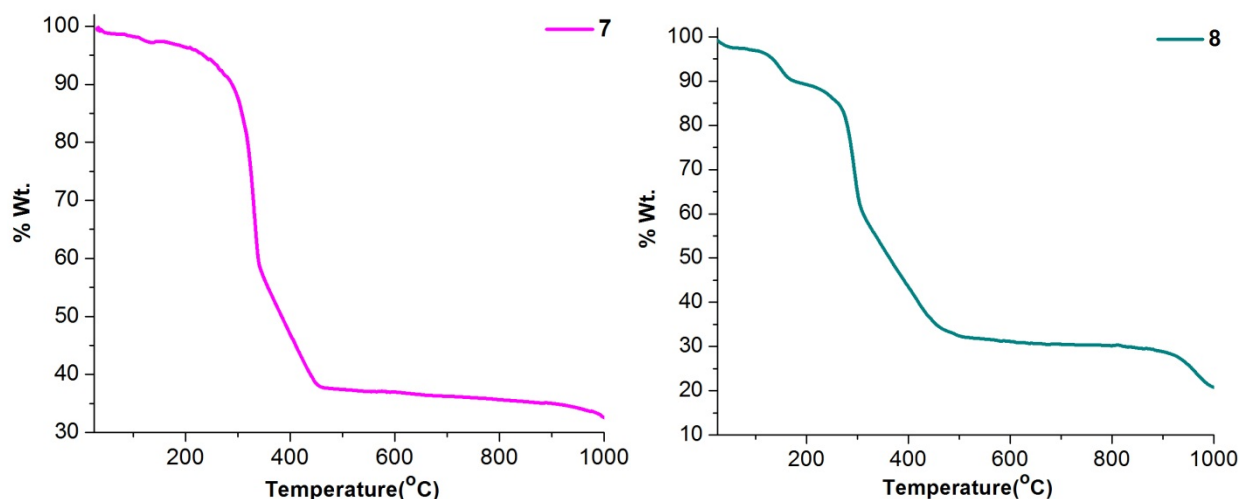

**Figure S3.** Thermogravimetric Analysis of compound **7** and **8**.

### **X-ray structure analysis**

Intensity data were collected on an Oxford Xcalibur CCD diffractometer (**1**, **3**, **6** and **7**) using monochromatic MoK $\alpha$  radiation. Intensity data for compound **2**, **4**, **5** and **8** was collected on a Rigaku Saturn724+ diffractometer using MoK $\alpha$  radiation. All calculations were carried out using the programs in WinGX module.<sup>1</sup>The structure was solved in each case by direct methods (SIR-92).<sup>2</sup> The final refinement of the structure was carried out using full least-squares methods on  $F^2$  using SHELXL-97<sup>3</sup> and SHELXL-2013.<sup>4</sup> Due to poor diffraction data of compound **7**, the structure could not be refined to satisfactory value and hence the metric parameters of this compound are not described in detail.

**Table S1:** Details of X-ray diffraction data of compound **1-4**.

| <b>Compound</b>                                  | <b>1</b>                                                                       | <b>2</b>                                                          | <b>3</b>                                                                                      | <b>4</b>                                                          |
|--------------------------------------------------|--------------------------------------------------------------------------------|-------------------------------------------------------------------|-----------------------------------------------------------------------------------------------|-------------------------------------------------------------------|
| Empirical formula                                | C <sub>44</sub> H <sub>56</sub> CoN <sub>4</sub> O <sub>8</sub> P <sub>2</sub> | C <sub>25</sub> H <sub>37</sub> CoN <sub>2</sub> O <sub>7</sub> P | C <sub>54</sub> H <sub>74</sub> Co <sub>2</sub> N <sub>4</sub> O <sub>14</sub> P <sub>2</sub> | C <sub>19</sub> H <sub>29</sub> CoN <sub>4</sub> O <sub>5</sub> P |
| Fw                                               | 889.80                                                                         | 567.46                                                            | 1182.97                                                                                       | 483.36                                                            |
| Temp, [K]                                        | 133(2)                                                                         | 150(2) K                                                          | 120(2)                                                                                        | 150(2) K                                                          |
| Crystal system                                   | Triclinic                                                                      | Monoclinic                                                        | Monoclinic                                                                                    | Orthorhombic                                                      |
| Space group                                      | <i>P</i> $\bar{1}$                                                             | P2 <sub>1</sub> /n                                                | P2 <sub>1</sub> /n                                                                            | Pbca                                                              |
| <i>a</i> , [Å]                                   | 9.3002(8)                                                                      | 12.313(3)                                                         | 11.3601(5)                                                                                    | 26.081(6)                                                         |
| <i>b</i> , [Å]                                   | 9.6080(8)                                                                      | 12.624(3)                                                         | 23.5841(11)                                                                                   | 18.290(4)                                                         |
| <i>c</i> , [Å]                                   | 13.0067(10)                                                                    | 18.217(5)                                                         | 11.9974(5)                                                                                    | 9.713(2)                                                          |
| $\alpha$ , [°]                                   | 82.120(6)                                                                      | 90                                                                | 90                                                                                            | 90                                                                |
| $\beta$ , [°]                                    | 86.980(6)                                                                      | 92.911(4)                                                         | 115.741(5)                                                                                    | 90                                                                |
| $\gamma$ , [°]                                   | 68.922(6)                                                                      | 90                                                                | 90                                                                                            | 90                                                                |
| <i>V</i> , [Å <sup>3</sup> ]                     | 1074.2(2)                                                                      | 2828.0(12)                                                        | 2895.3(2)                                                                                     | 4633.3(18)                                                        |
| <i>Z</i>                                         | 1                                                                              | 4                                                                 | 2                                                                                             | 8                                                                 |
| D(calcd), [g/cm <sup>3</sup> ]                   | 1.375                                                                          | 1.333                                                             | 1.357                                                                                         | 1.386                                                             |
| $\mu$ [mm <sup>-1</sup> ]                        | 0.531                                                                          | 0.707                                                             | 0.694                                                                                         | 0.846                                                             |
| GOF                                              | 1.043                                                                          | 1.093                                                             | 1.035                                                                                         | 1.164                                                             |
| R1(I <sub>0</sub> >2 $\sigma$ (I <sub>0</sub> )) | 0.0271                                                                         | 0.0300                                                            | 0.0330                                                                                        | 0.0620                                                            |
| wR2 (all data)                                   | 0.0714                                                                         | wR2 = 0.0780                                                      | 0.0765                                                                                        | 0.1428                                                            |
| largest hole and peak<br>[e · Å <sup>-3</sup> ]  | -0.331, 0.210                                                                  | 0.441 and -0.464                                                  | -0.298, 0.321                                                                                 | 0.664 and -0.599                                                  |

**Table S2:** Details of X-ray diffraction data of compound **5**, **6** and **8**.

| <b>Compound</b>                                  | <b>5</b>                                                                                      | <b>6</b>                                                                                      | <b>8</b>                                                                                       |
|--------------------------------------------------|-----------------------------------------------------------------------------------------------|-----------------------------------------------------------------------------------------------|------------------------------------------------------------------------------------------------|
| Empirical formula                                | C <sub>46</sub> H <sub>74</sub> Co <sub>2</sub> N <sub>8</sub> O <sub>10</sub> P <sub>2</sub> | C <sub>68</sub> H <sub>92</sub> Co <sub>4</sub> N <sub>8</sub> O <sub>16</sub> P <sub>4</sub> | C <sub>72</sub> H <sub>84</sub> Co <sub>4</sub> N <sub>12</sub> O <sub>16</sub> P <sub>4</sub> |
| Fw                                               | 1078.93                                                                                       | 1637.10                                                                                       | 1733.14                                                                                        |
| Temp, [K]                                        | 150(2) K                                                                                      | 123(2) K                                                                                      | 150(2)K                                                                                        |
| Crystal system                                   | Triclinic                                                                                     | Monoclinic                                                                                    | Tetragonal                                                                                     |
| Space group                                      | <i>P</i> $\bar{1}$                                                                            | C 2/c                                                                                         | P4/nnc                                                                                         |
| <i>a</i> , [Å]                                   | 9.2911(16)                                                                                    | 29.3794(12)                                                                                   | 18.037(3)                                                                                      |
| <i>b</i> , [Å]                                   | 11.821(3)                                                                                     | 14.5450(4)                                                                                    | 18.037(3)                                                                                      |
| <i>c</i> , [Å]                                   | 12.926(3)                                                                                     | 19.9624(7)                                                                                    | 30.914(5)                                                                                      |
| $\alpha$ , [°]                                   | 88.042(7)                                                                                     | 90                                                                                            | 90                                                                                             |
| $\beta$ , [°]                                    | 78.263(7)                                                                                     | 111.705(4)                                                                                    | 90                                                                                             |
| $\gamma$ , [°]                                   | 82.427(8)                                                                                     | 90                                                                                            | 90                                                                                             |
| <i>V</i> , [Å <sup>3</sup> ]                     | 1377.8(5)                                                                                     | 7925.6(5)                                                                                     | 10057(3)                                                                                       |
| <i>Z</i>                                         | 1                                                                                             | 4                                                                                             | 4                                                                                              |
| D(calcd), [g/cm <sup>3</sup> ]                   | 1.30                                                                                          | 1.372                                                                                         | 1.145                                                                                          |
| $\mu$ [mm <sup>-1</sup> ]                        | 0.718                                                                                         | 0.969                                                                                         | 0.768                                                                                          |
| GOF                                              | 1.062                                                                                         | 1.025                                                                                         | 1.123                                                                                          |
| R1(I <sub>0</sub> >2 $\sigma$ (I <sub>0</sub> )) | 0.0302                                                                                        | 0.0560                                                                                        | 0.0705                                                                                         |
| wR2 (all data)                                   | 0.0794                                                                                        | 0.0967                                                                                        | 0.1960                                                                                         |
| largest hole and peak [e · Å <sup>-3</sup> ]     | 0.361 and -0.312                                                                              | -0.539, 0.805                                                                                 | 0.408 and -0.430                                                                               |

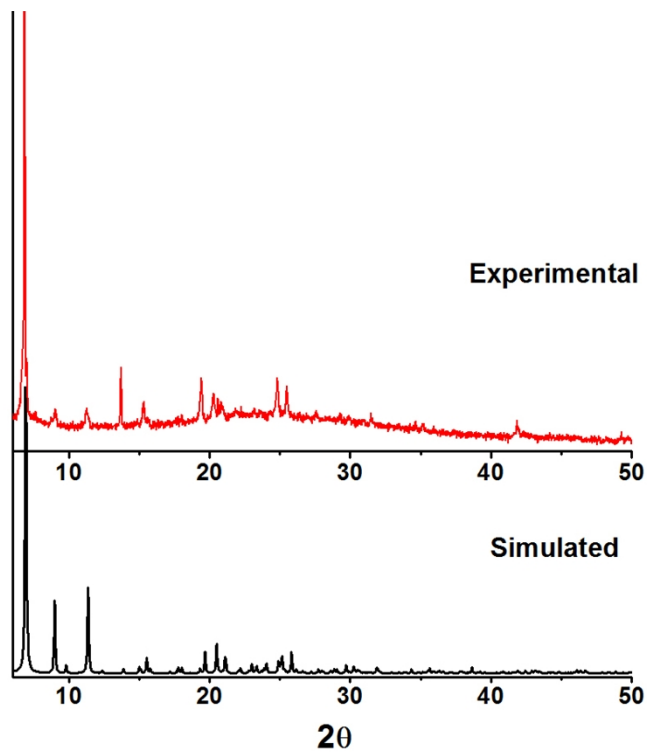

**Figure S4.** Simulated and experimental PXRD pattern of the activated compound **8**.

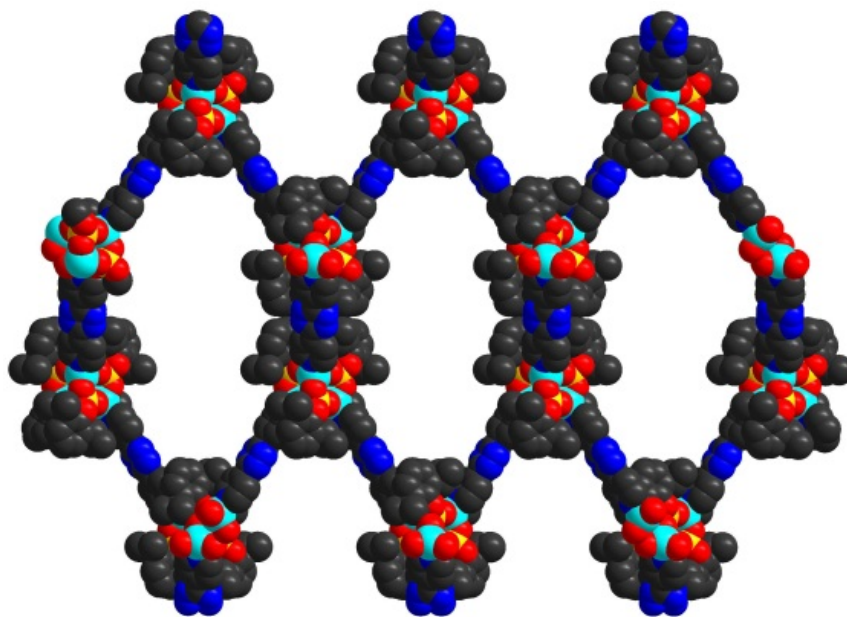

**Figure S5.** Space filling model showing hexagonal channels in the framework of **8**.

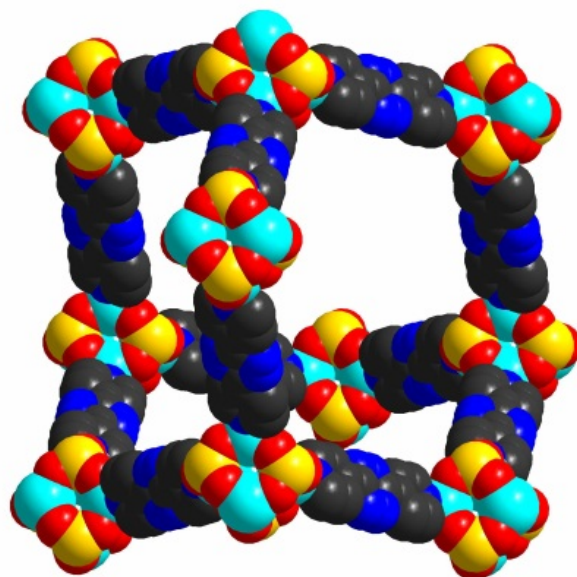

**Figure S6.** Space filling model showing a single unit of diamond framework in compound **8**.

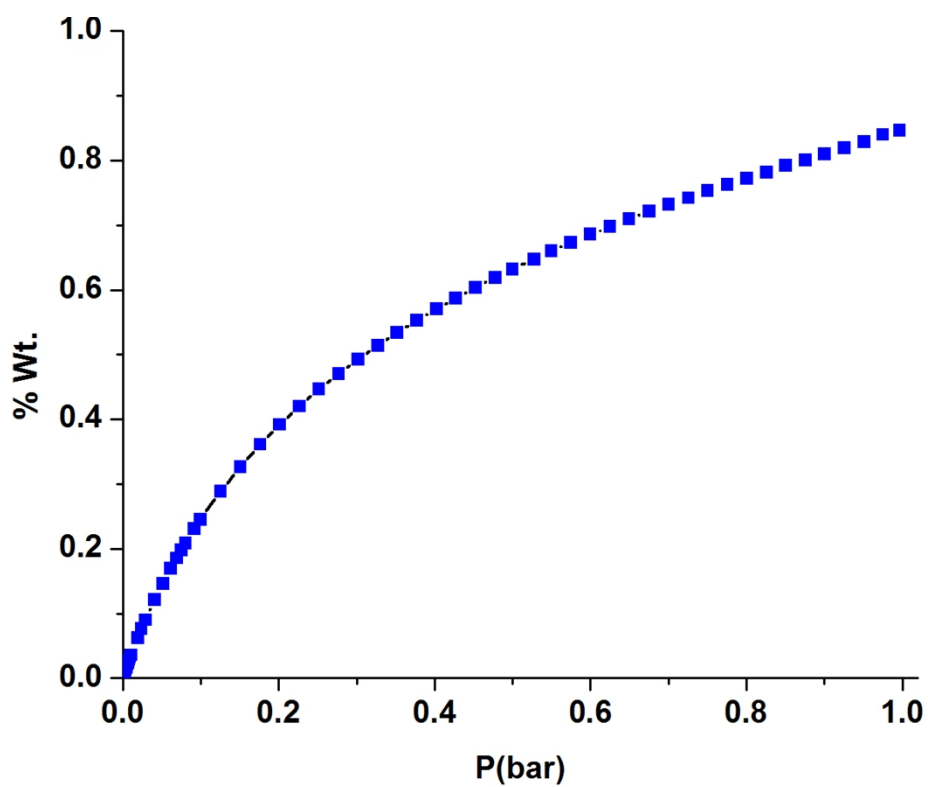

**Figure S7.** H<sub>2</sub> adsorption isotherm at 77K for framework **8**.



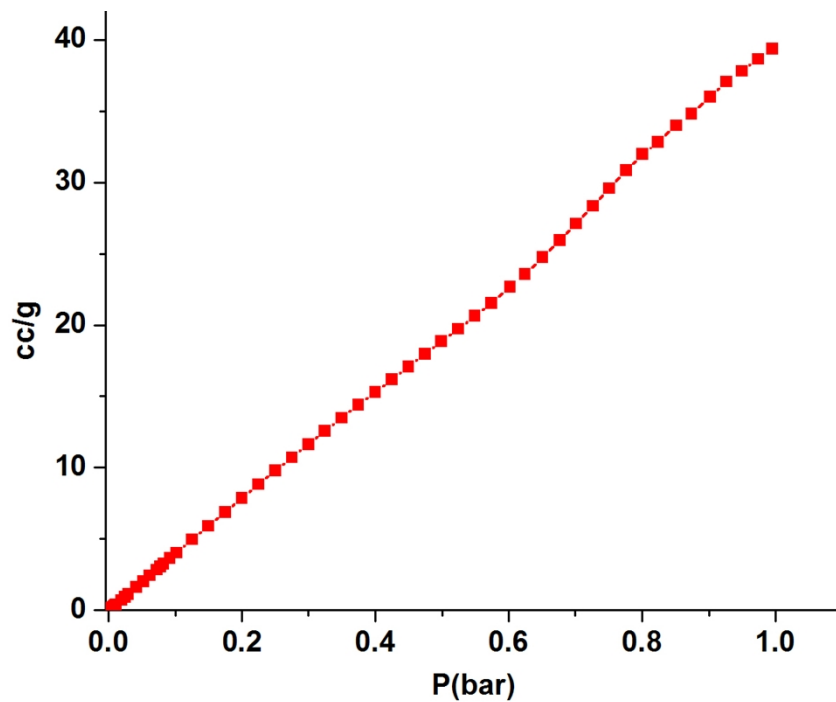

Figure S8. CO<sub>2</sub> adsorption isotherm at 273K for framework **8**.

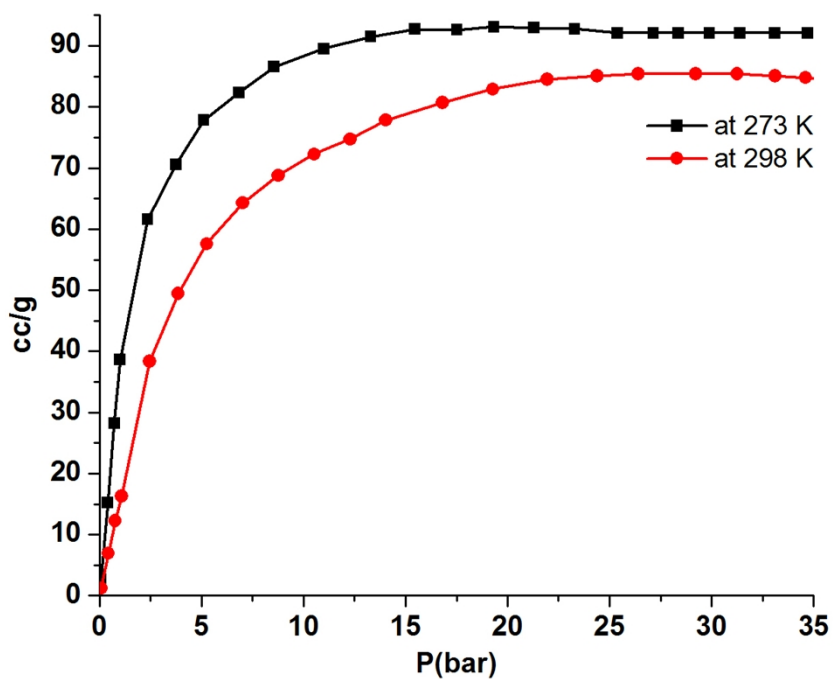

Figure S9. High pressure CO<sub>2</sub> adsorption isotherm at 273K and 298K for framework **8**.

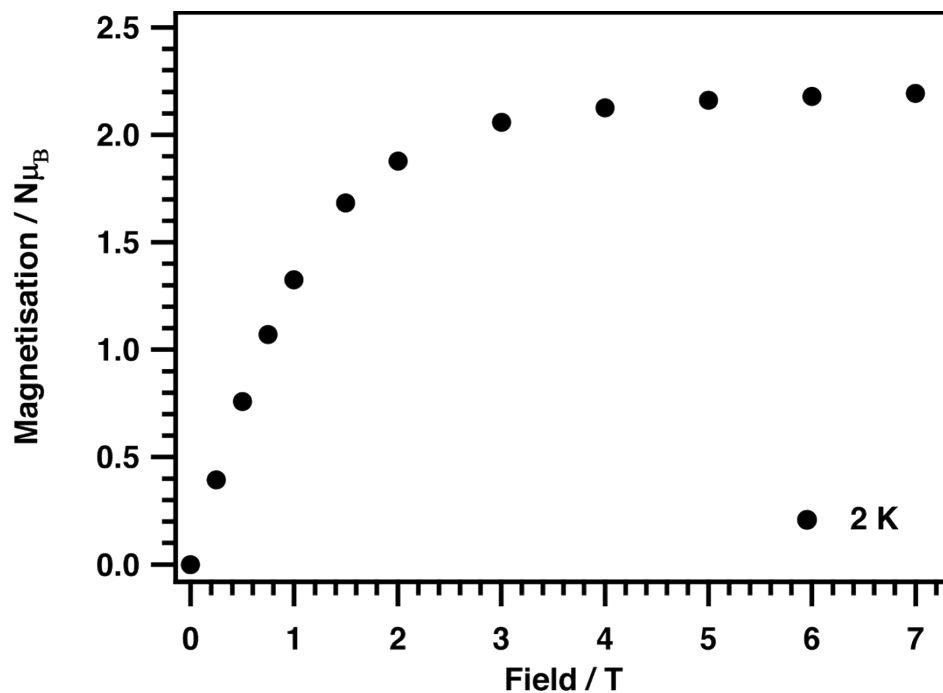

Figure S10: Field-dependent magnetisation of compound 1 at 2 K.

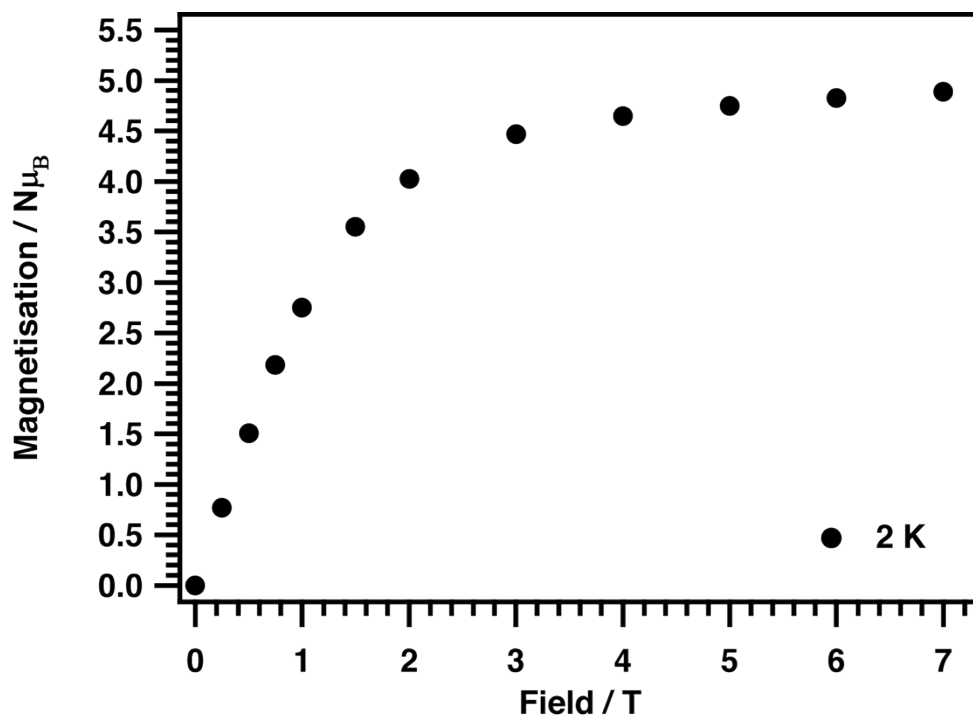

Figure S11: Field-dependent magnetisation of compound 3 at 2 K.

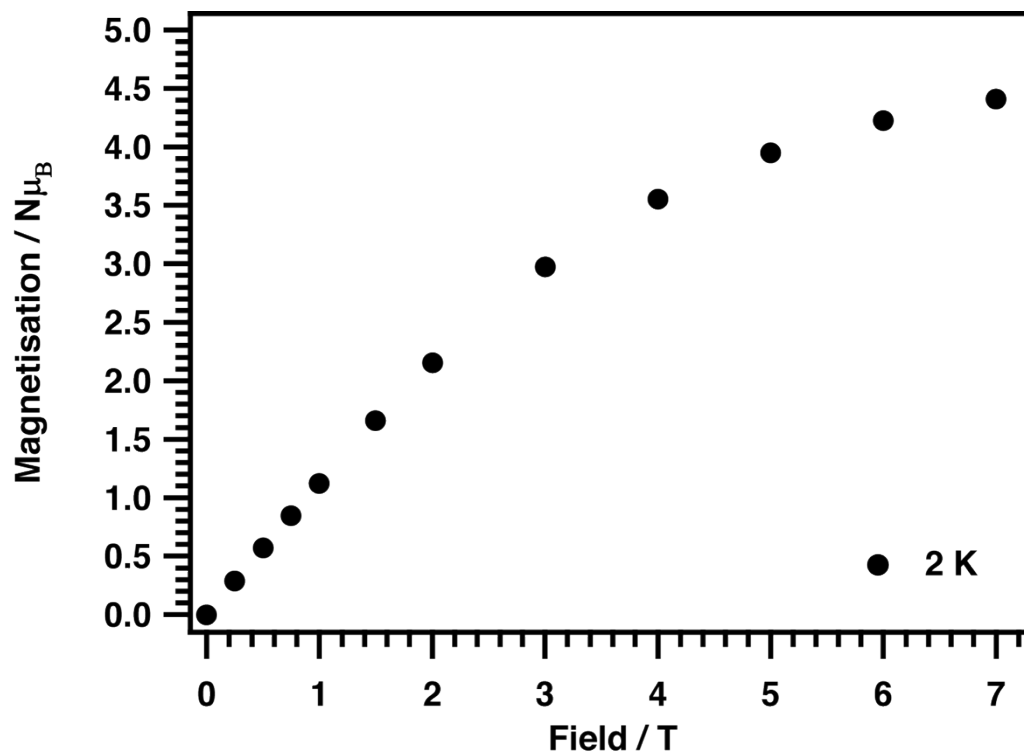

Figure S12: Field-dependent magnetisation of compound 2 at 2 K.

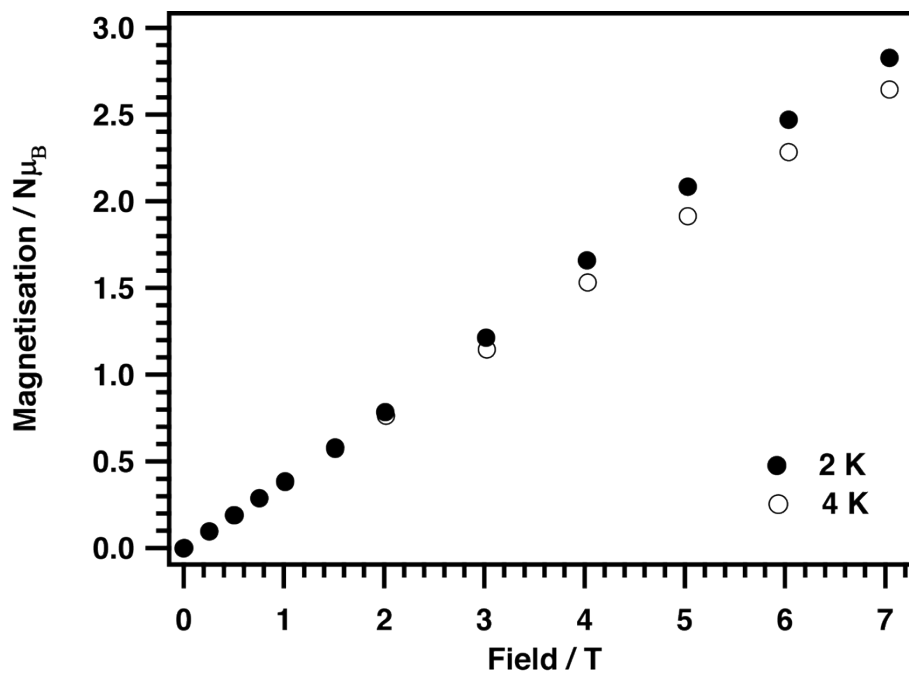

Figure S13: Field-dependent magnetisation of compound 4 at 2 and 4 K.

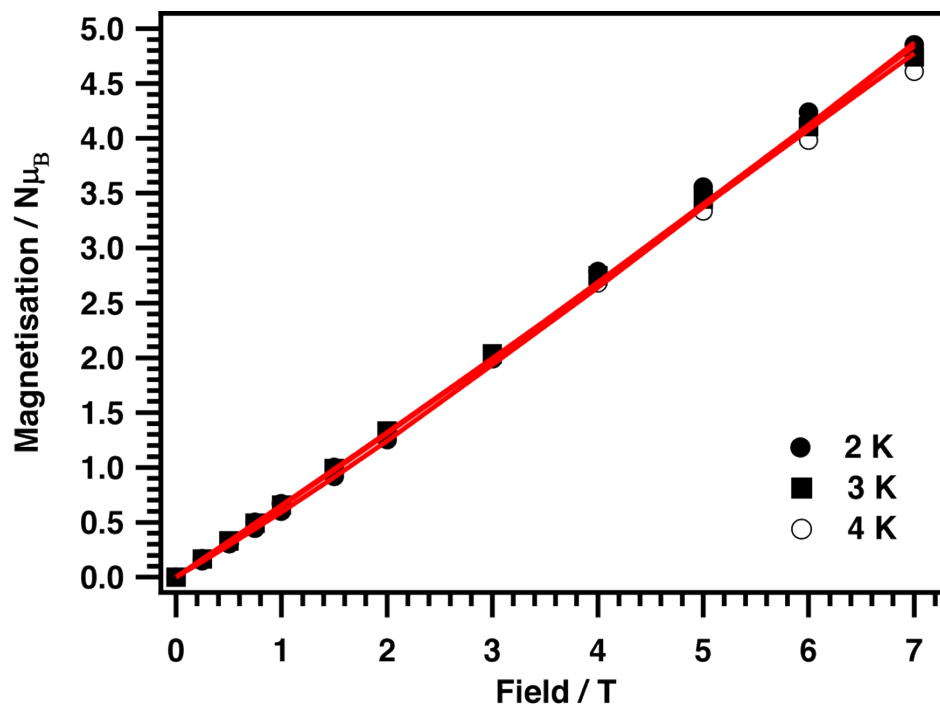

**Figure S14:** Field-dependent magnetisation of compound 6 at 2 and 4 K. Red lines represent calculations with  $g = 2.36$ ,  $J = -1.51 \text{ cm}^{-1}$ .

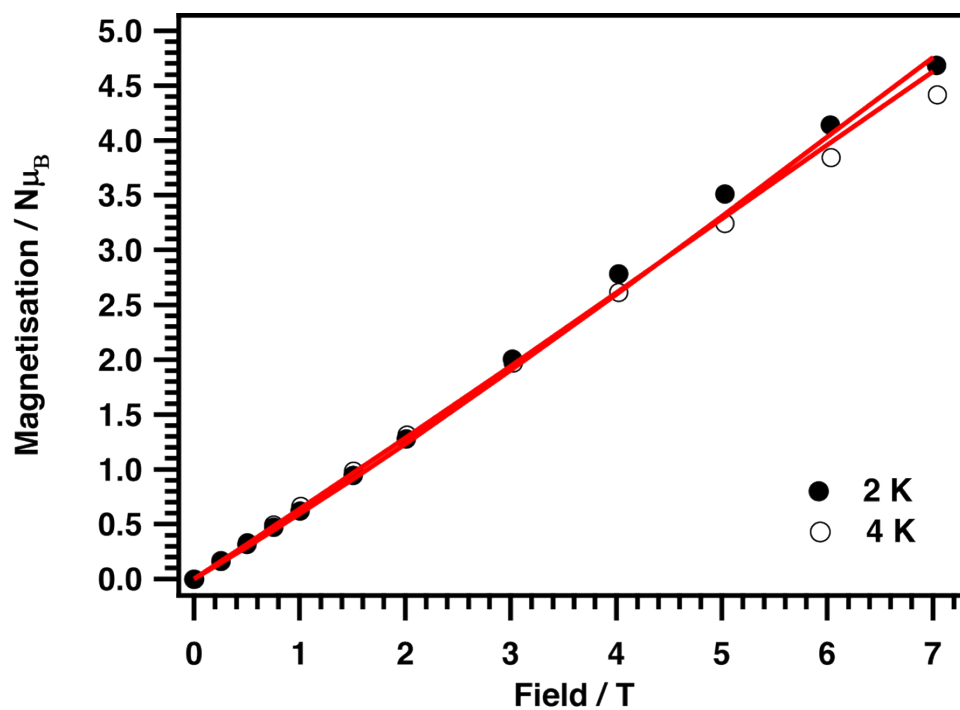

**Figure S15:** Field-dependent magnetisation of compound 7 at 2 and 4 K. Red lines represent calculation with  $g = 2.23$ ,  $J = -1.39 \text{ cm}^{-1}$ .

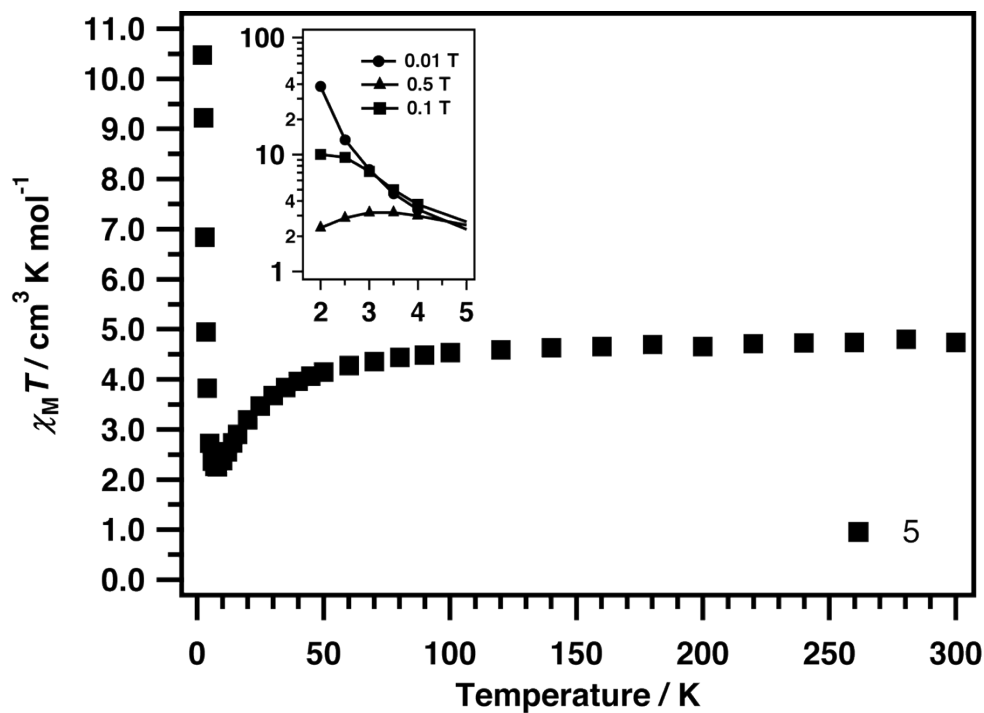

**Figure S16:** Temperature-dependent susceptibility of compound **5** under a static field of 0.1 T.

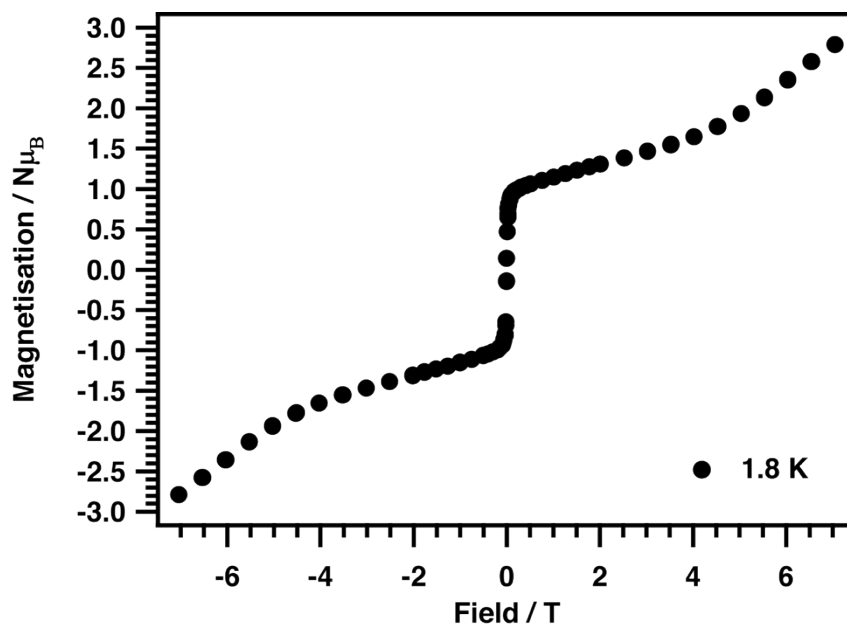

**Figure S17:** Field-dependent magnetisation of compound **5** at 1.8 K. The rise to  $\sim 1.1 N\mu_B$  between zero field and 0.3 T is not consistent with a simple isolated dimer. No hysteresis is observed.

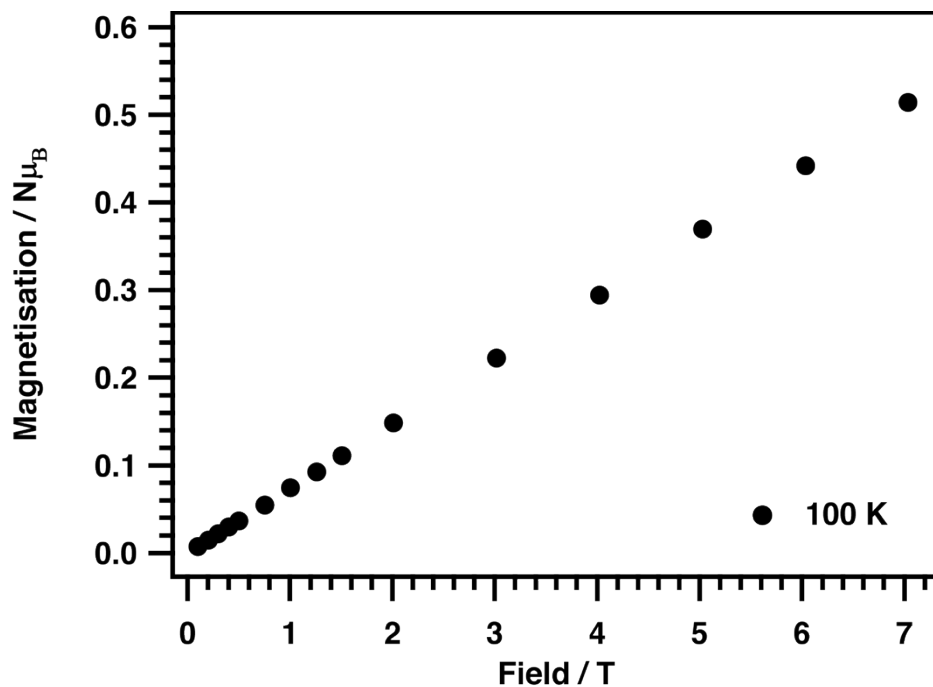

**Figure S18:** Field-dependent magnetisation measurements at 100 K show a linear increase with field: this appears to rule out the presence of common cobalt-oxide nanoparticles (e.g.  $\text{Co}_3\text{O}_4$ ).

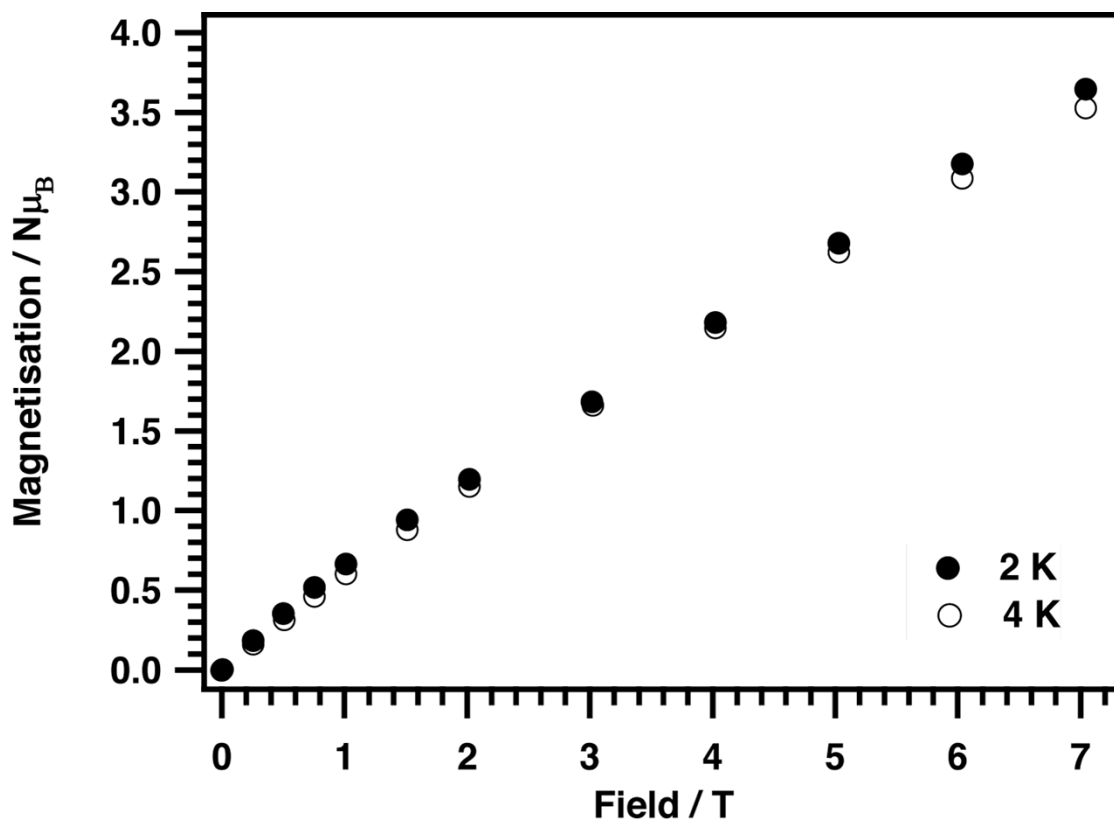

**Figure S19:** Field-dependent magnetisation of compound 8 at 2 and 4 K.

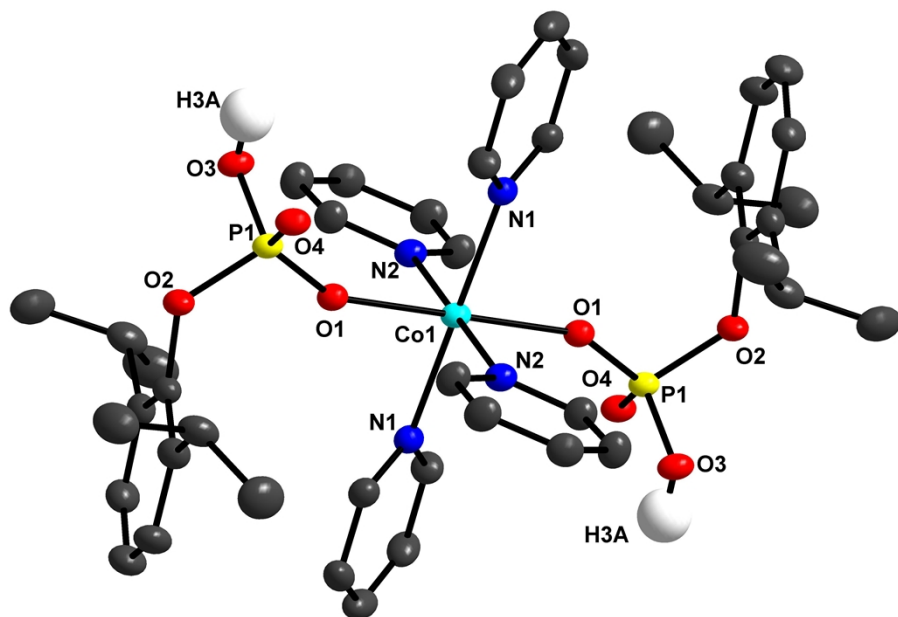

Figure S20. Thermal ellipsoid plot for [Co(py)<sub>4</sub>(dippH)<sub>2</sub>] (1).

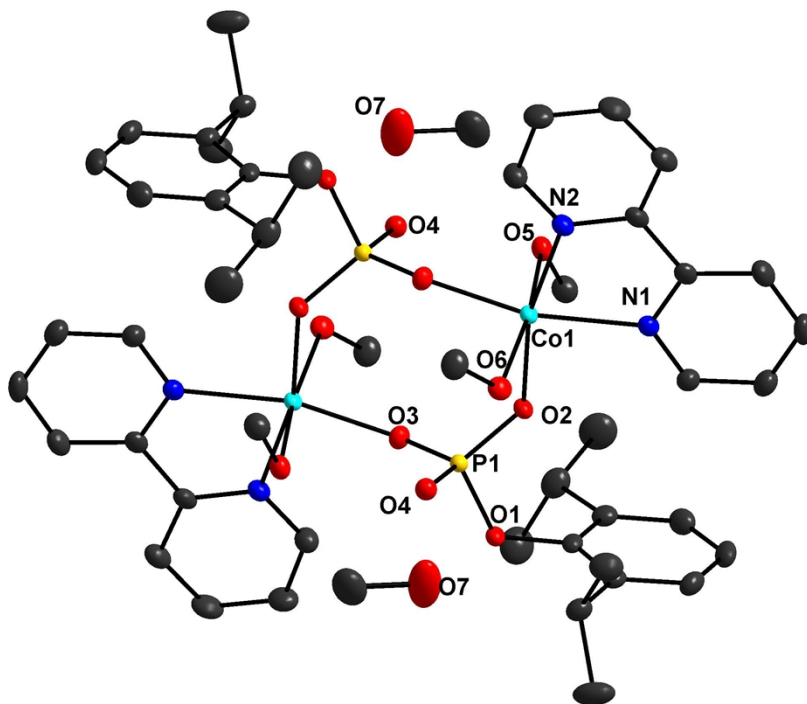

Figure S21. Thermal ellipsoid plot for [Co(dipp)(bpy)(MeOH)<sub>2</sub>]·2MeOH (2).

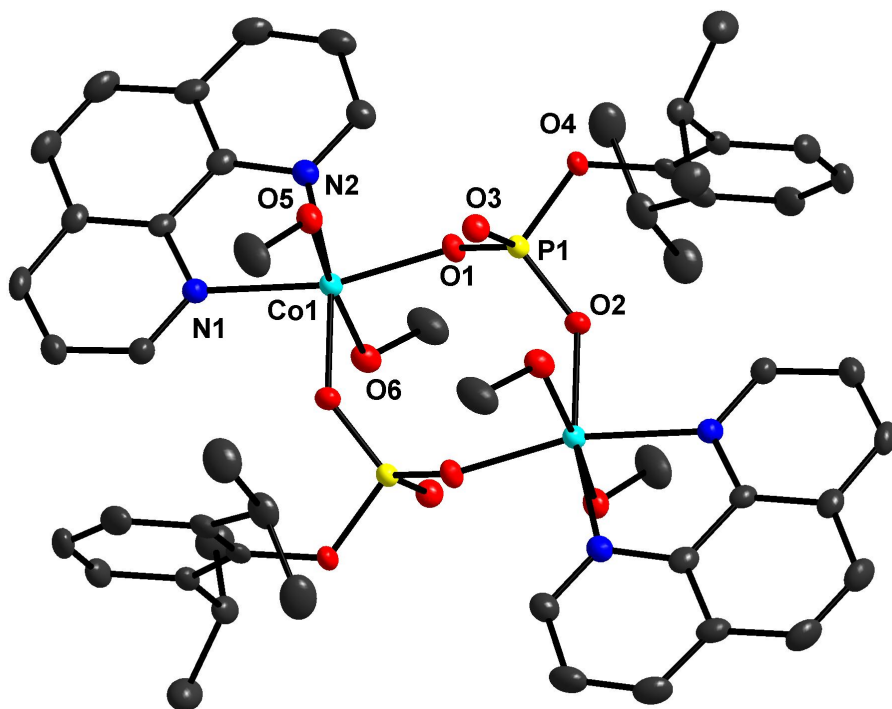

**Figure S22.** Thermal ellipsoid plot for [Co(dipp)(phen)(MeOH)<sub>2</sub>]<sub>2</sub>·2MeOH (**3**).

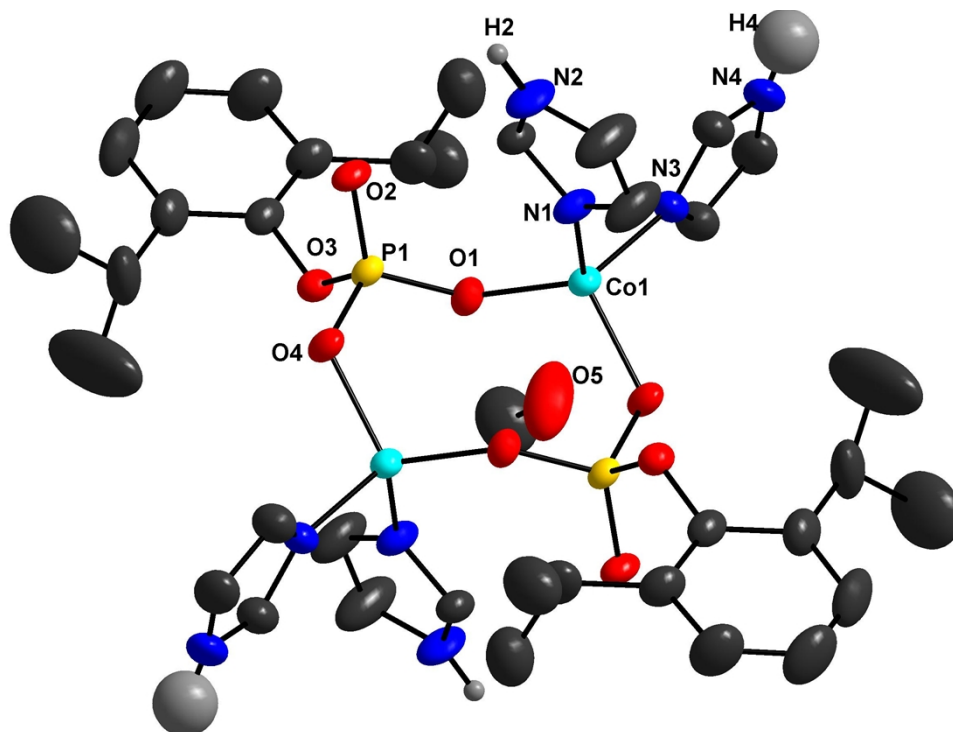

**Figure S23.** Thermal ellipsoid plot for [Co(dipp)(Imz)<sub>2</sub>]<sub>2</sub>·2MeOH (**4**).



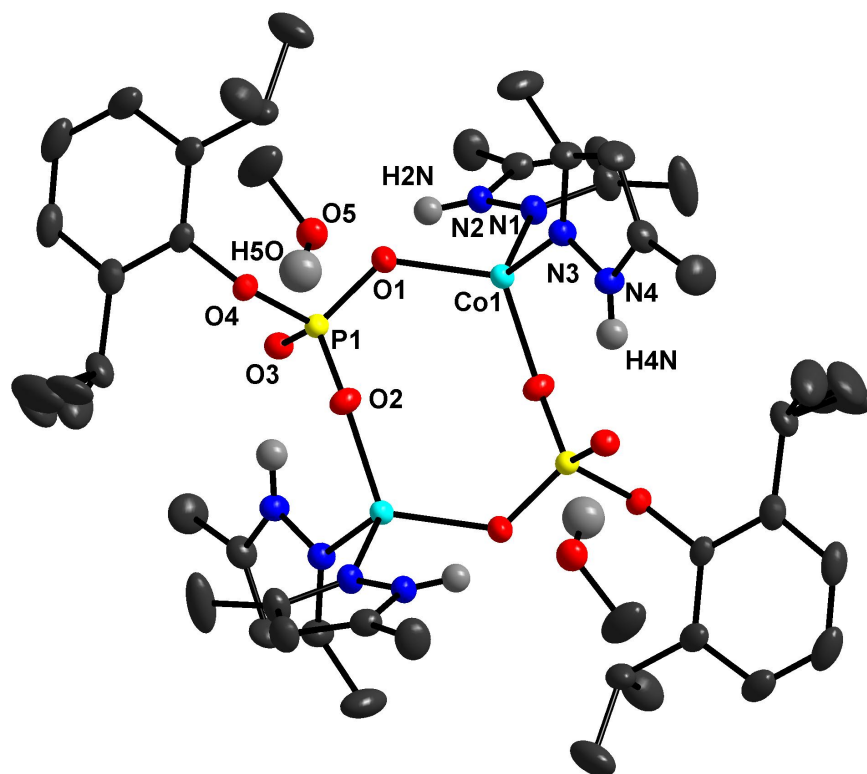

**Figure S23.** Thermal ellipsoid plot for  $[\text{Co}(\text{dmpz})_2(\text{dipp})]_2 \cdot 2\text{MeOH}$  (**5**).

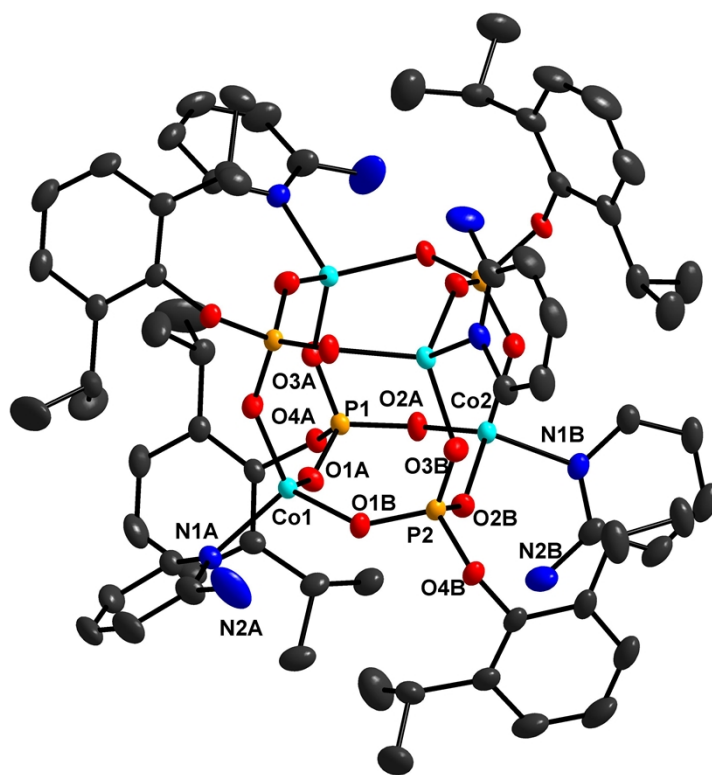

**Figure S24.** Thermal ellipsoid plot for  $[\text{Co}(\text{dipp})(2\text{-apy})]_4$  (**6**).

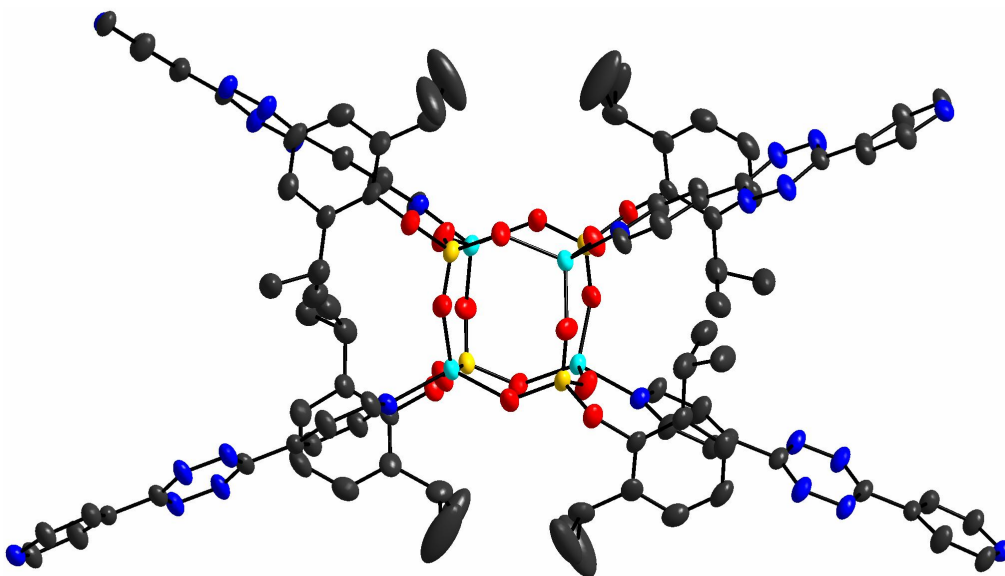

**Figure S24.** Thermal ellipsoid plot for  $[\text{Co}(\text{dipp})(\text{dptz})]_{4n}$  (**8**).

**Table S3.** Selected bond lengths [ $\text{\AA}$ ] and angles [ $^\circ$ ] for  $[\text{Co}(\text{dippH})_2(\text{py})_4]$  (**1**)

|            |          |                     |           |                     |           |
|------------|----------|---------------------|-----------|---------------------|-----------|
| Co(1)-N(1) | 2.150(1) | N(1)#1-Co(1)-N(1)   | 180.0     | N(1)#1-Co(1)-N(2)   | 90.08(5)  |
| Co(1)-O(1) | 2.109(1) | N(1)-Co(1)-N(2)     | 89.92(5)  | N(1)-Co(1)-N(2)#1   | 90.08(5)  |
| P(1)-O(2)  | 1.615(1) | N(1)#1-Co(1)-N(2)#1 | 89.92(5)  | N(2)-Co(1)-N(2)#1   | 180.0     |
| P(1)-O(4)  | 1.496(1) | O(1)-Co(1)-N(1)     | 87.37(5)  | O(1)#1-Co(1)-N(1)   | 92.63(5)  |
| Co(1)-N(2) | 2.232(1) | O(1)-Co(1)-N(1)#1   | 92.63(5)  | O(1)#1-Co(1)-N(1)#1 | 87.37(5)  |
| P(1)-O(1)  | 1.497(1) | O(1)-Co(1)-N(2)     | 91.51(5)  | O(1)#1-Co(1)-N(2)   | 88.49(5)  |
| P(1)-O(3)  | 1.567(1) | O(1)-Co(1)-N(2)#1   | 88.49(5)  | O(1)#1-Co(1)-N(2)#1 | 91.51(5)  |
|            |          | O(1)-Co(1)-O(1)#1   | 180.0     | O(1)-P(1)-O(2)      | 107.62(6) |
|            |          | O(1)-P(1)-O(3)      | 111.03(7) | O(3)-P(1)-O(2)      | 101.04(7) |
|            |          | O(4)-P(1)-O(1)      | 116.99(7) | O(4)-P(1)-O(2)      | 108.19(7) |
|            |          | O(4)-P(1)-O(3)      | 110.66(7) | N(1)#1-Co(1)-N(2)   | 90.08(5)  |

**Table S4.** Selected bond lengths [ $\text{\AA}$ ] and angles [ $^\circ$ ] for  $[\text{Co}(\text{dipp})(\text{bpy})(\text{MeOH})_2]_2 \cdot 2\text{MeOH}$  (**2**)

|              |            |                   |           |                   |           |
|--------------|------------|-------------------|-----------|-------------------|-----------|
| Co(1)-O(2)   | 1.9967(11) | O(2)-Co(1)-O(3)#1 | 104.30(5) | N(2)-Co(1)-O(6)   | 93.36(5)  |
| Co(1)-O(3)#1 | 2.0094(11) | O(2)-Co(1)-N(2)   | 165.08(5) | N(1)-Co(1)-O(6)   | 97.78(5)  |
| Co(1)-N(2)   | 2.1191(14) | O(3)#1-Co(1)-N(2) | 90.18(5)  | O(5)-Co(1)-O(6)   | 170.75(4) |
| Co(1)-N(1)   | 2.1547(14) | O(2)-Co(1)-N(1)   | 89.94(5)  | O(3)-P(1)-O(2)    | 114.22(6) |
| Co(1)-O(5)   | 2.2301(12) | O(3)#1-Co(1)-N(1) | 165.57(5) | O(3)-P(1)-O(4)    | 112.12(6) |
| Co(1)-O(6)   | 2.2307(12) | N(2)-Co(1)-N(1)   | 75.76(5)  | O(2)-P(1)-O(4)    | 112.82(6) |
| P(1)-O(3)    | 1.5109(12) | O(2)-Co(1)-O(5)   | 90.07(5)  | O(3)-P(1)-O(1)    | 103.83(6) |
| P(1)-O(2)    | 1.5176(12) | O(3)#1-Co(1)-O(5) | 88.21(5)  | O(2)-P(1)-O(1)    | 105.40(6) |
| P(1)-O(4)    | 1.5280(12) | N(1)-Co(1)-O(5)   | 89.48(5)  | O(4)-P(1)-O(1)    | 107.58(6) |
| P(1)-O(1)    | 1.6329(11) | O(2)-Co(1)-O(6)   | 84.24(5)  | P(1)-O(2)-Co(1)   | 129.98(7) |
|              |            | O(3)#1-Co(1)-O(6) | 86.14(5)  | P(1)-O(3)-Co(1)#1 | 137.49(7) |

**Table S5.** Selected bond lengths [ $\text{\AA}$ ] and angles [ $^\circ$ ] for  $[\text{Co}(\text{dipp})(\text{phen})(\text{MeOH})_2]_2 \cdot 2\text{MeOH}$  (**3**)

|            |           |                 |           |                 |           |
|------------|-----------|-----------------|-----------|-----------------|-----------|
| Co(1)-N(1) | 2.1418(2) | N(1)-Co(1)-N(2) | 76.72(7)  | O(1)-Co(1)-O(5) | 86.17(6)  |
| Co(1)-N(2) | 2.1517(2) | N(1)-Co(1)-O(1) | 165.51(7) | O(1)-Co(1)-O(6) | 89.12(7)  |
| Co(1)-O(1) | 2.0023(1) | N(1)-Co(1)-O(2) | 90.44(7)  | O(2)-Co(1)-O(5) | 89.72(6)  |
| Co(1)-O(2) | 2.0139(1) | N(1)-Co(1)-O(5) | 90.00(7)  | O(2)-Co(1)-O(6) | 86.15(6)  |
| Co(1)-O(5) | 2.1990(2) | N(1)-Co(1)-O(6) | 95.86(7)  | O(5)-Co(1)-O(6) | 172.85(7) |
| Co(1)-O(6) | 2.1810(2) | N(2)-Co(1)-O(1) | 89.63(7)  | P(1)-O(1)-Co(1) | 134.96(9) |
| P(1)-O(1)  | 1.502(1)  | N(2)-Co(1)-O(2) | 166.49(7) | P(2)-O(2)-Co(1) | 133.76(0) |
| P(1)-O(2)  | 1.512(2)  | N(2)-Co(1)-O(5) | 94.41(7)  |                 |           |
| P(1)-O(3)  | 1.5241(2) | N(2)-Co(1)-O(6) | 90.93(7)  |                 |           |
| P(1)-O(4)  | 1.6262(1) | O(1)-Co(1)-O(2) | 103.49(6) |                 |           |

**Table S6.** Selected bond lengths [ $\text{\AA}$ ] and angles [ $^\circ$ ] for  $[\text{Co}(\text{Imz})_2(\text{dipp})]_2 \cdot 2\text{MeOH}$  (**4**)

|             |          |                 |            |                   |            |
|-------------|----------|-----------------|------------|-------------------|------------|
| Co(1)-O(1)  | 1.936(3) | O(1)-Co(1)-O(4) | 111.67(12) | P(1)#1-O(4)-Co(1) | 122.07(15) |
| Co(1)-O(4)  | 1.946(3) | O(1)-Co(1)-N(1) | 112.76(13) | O(2)-P(1)-O(1)    | 116.07(17) |
| Co(1)-N(1)  | 2.009(3) | O(4)-Co(1)-N(1) | 112.03(13) | O(2)-P(1)-O(4)#1  | 113.12(17) |
| Co(1)-N(3)  | 2.009(3) | O(1)-Co(1)-N(3) | 109.70(13) | O(1)-P(1)-O(4)#1  | 109.17(15) |
| O(1)-P(1)   | 1.524(3) | O(4)-Co(1)-N(3) | 106.40(13) | O(2)-P(1)-O(3)    | 109.30(15) |
| O(2)-P(1)   | 1.483(3) | N(1)-Co(1)-N(3) | 103.77(15) | O(1)-P(1)-O(3)    | 103.57(15) |
| O(3)-P(1)   | 1.613(3) | P(1)-O(1)-Co(1) | 135.10(17) | O(4)#1-P(1)-O(3)  | 104.55(16) |
| O(4)-P(1)#1 | 1.531(3) |                 |            |                   |            |

**Table S7.** Selected bond lengths [ $\text{\AA}$ ] and angles [ $^\circ$ ] for  $[\text{Co}(\text{dipp})(\text{dmpz})_2]_2 \cdot 2\text{MeOH}$  (**5**)

|              |            |                   |           |
|--------------|------------|-------------------|-----------|
| Co(1)-O(2)#1 | 1.9197(13) | O(2)#1-Co(1)-O(1) | 116.49(6) |
| Co(1)-O(1)   | 1.9255(13) | O(2)#1-Co(1)-N(3) | 109.96(6) |
| Co(1)-N(3)   | 2.0079(15) | O(1)-Co(1)-N(3)   | 111.87(6) |
| Co(1)-N(1)   | 2.0155(16) | O(2)#1-Co(1)-N(1) | 104.76(6) |
| P(1)-O(3)    | 1.5073(13) | O(1)-Co(1)-N(1)   | 103.20(6) |
| P(1)-O(2)    | 1.5157(13) | N(3)-Co(1)-N(1)   | 109.96(6) |
| P(1)-O(1)    | 1.5220(13) | P(1)-O(1)-Co(1)   | 127.42(8) |
| P(1)-O(4)    | 1.6219(13) | P(1)-O(2)-Co(1)#1 | 137.11(8) |

**Table S8.** Selected bond lengths [ $\text{\AA}$ ] and angles [ $^\circ$ ] for  $[\text{Co}(\text{dipp})(2\text{-apy})]_4$  (**6**)

|               |            |                     |           |                    |            |
|---------------|------------|---------------------|-----------|--------------------|------------|
| Co(1)-O(3A)#1 | 1.9210(14) | O(3A)#1-Co(1)-O(1A) | 114.05(6) | P(2)-O(1B)-Co(1)   | 128.06(9)  |
| Co(1)-O(1A)   | 1.9282(13) | O(3A)#1-Co(1)-O(1B) | 109.62(6) | P(2)-O(2B)-Co(2)   | 135.44(10) |
| Co(1)-O(1B)   | 1.9531(14) | O(1A)-Co(1)-O(1B)   | 115.02(6) | P(2)-O(3B)-Co(2)#1 | 138.62(10) |
| Co(1)-N(1A)   | 2.0333(17) | O(3A)#1-Co(1)-N(1A) | 107.42(7) | O(3A)-P(1)-O(1A)   | 112.97(8)  |
| Co(2)-O(2A)   | 1.9205(14) | O(1A)-Co(1)-N(1A)   | 102.65(6) | O(3A)-P(1)-O(2A)   | 113.63(9)  |
| Co(2)-O(3B)#1 | 1.9224(16) | O(1B)-Co(1)-N(1A)   | 107.38(7) | O(1A)-P(1)-O(2A)   | 114.36(9)  |
| Co(2)-O(2B)   | 1.9407(14) | O(2A)-Co(2)-O(3B)#1 | 114.03(7) | O(3A)-P(1)-O(4A)   | 107.19(8)  |
| Co(2)-N(1B)   | 2.0453(17) | O(2A)-Co(2)-O(2B)   | 108.24(6) | O(1A)-P(1)-O(4A)   | 106.90(8)  |
| P(1)-O(3A)    | 1.5052(15) | O(3B)#1-Co(2)-O(2B) | 118.89(6) | O(2A)-P(1)-O(4A)   | 100.51(7)  |
| P(1)-O(1A)    | 1.5114(14) | O(2A)-Co(2)-N(1B)   | 113.00(7) | O(3B)-P(2)-O(1B)   | 113.43(9)  |
| P(1)-O(2A)    | 1.5211(15) | O(3B)#1-Co(2)-N(1B) | 100.46(7) | O(3B)-P(2)-O(2B)   | 113.39(9)  |
| P(1)-O(4A)    | 1.6132(14) | O(2B)-Co(2)-N(1B)   | 101.31(7) | O(1B)-P(2)-O(2B)   | 112.29(8)  |
| P(2)-O(3B)    | 1.5097(16) | P(1)-O(1A)-Co(1)    | 135.79(9) | O(3B)-P(2)-O(4B)   | 103.98(8)  |
| P(2)-O(1B)    | 1.5177(15) | P(1)-O(2A)-Co(2)    | 129.40(9) | O(1B)-P(2)-O(4B)   | 106.28(8)  |
| P(2)-O(2B)    | 1.5188(15) | P(1)-O(3A)-Co(1)#1  | 143.15(9) | O(2B)-P(2)-O(4B)   | 106.59(8)  |
| P(2)-O(4B)    | 1.6070(14) |                     |           |                    |            |

**Table S9.** Selected bond lengths [Å] and angles [°] for [Co<sub>4</sub>(dipp)<sub>4</sub>(2-apy)<sub>3</sub>(DMSO)]·(DMSO)·(H<sub>2</sub>O) (**7**)

|             |           |                  |           |                   |          |
|-------------|-----------|------------------|-----------|-------------------|----------|
| Co(1)-O(5)  | 1.924(13) | Co(4)-O(11)      | 1.890(13) | O(2)-Co(2)-N(1)   | 107.9(6) |
| Co(1)-O(1)  | 1.940(11) | Co(4)-O(15)      | 1.939(10) | O(13)-Co(2)-N(1)  | 103.2(6) |
| Co(1)-O(17) | 1.960(12) | Co(4)-N(5)       | 2.036(11) | O(10)-Co(3)-O(14) | 113.5(6) |
| Co(1)-O(9)  | 1.966(9)  | O(5)-Co(1)-O(1)  | 111.4(5)  | O(10)-Co(3)-O(3)  | 111.4(5) |
| Co(2)-O(6)  | 1.903(12) | O(5)-Co(1)-O(17) | 100.7(6)  | O(14)-Co(3)-O(3)  | 116.9(5) |
| Co(2)-O(2)  | 1.921(13) | O(1)-Co(1)-O(17) | 102.6(6)  | O(10)-Co(3)-N(3)  | 101.4(5) |
| Co(2)-O(13) | 1.921(11) | O(5)-Co(1)-O(9)  | 118.4(5)  | O(14)-Co(3)-N(3)  | 105.7(6) |
| Co(2)-N(1)  | 2.014(14) | O(1)-Co(1)-O(9)  | 114.9(5)  | O(3)-Co(3)-N(3)   | 106.1(6) |
| Co(3)-O(10) | 1.916(12) | O(17)-Co(1)-O(9) | 106.1(5)  | O(7)-Co(4)-O(11)  | 115.0(6) |
| Co(3)-O(14) | 1.932(13) | O(6)-Co(2)-O(2)  | 107.8(5)  | O(7)-Co(4)-O(15)  | 114.2(5) |
| Co(3)-O(3)  | 1.947(11) | O(6)-Co(2)-O(13) | 113.4(5)  | O(11)-Co(4)-O(15) | 113.5(6) |
| Co(3)-N(3)  | 2.030(13) | O(2)-Co(2)-O(13) | 118.6(5)  | O(7)-Co(4)-N(5)   | 103.7(5) |
| Co(4)-O(7)  | 1.883(13) | O(6)-Co(2)-N(1)  | 104.8(6)  |                   |          |

**Table S10.** Selected bond lengths [Å] and angles [°] for {[Co(dipp)(dptz)<sub>0.5</sub>]<sub>4</sub>}<sub>n</sub> (**8**)

|             |          |                    |            |                   |            |
|-------------|----------|--------------------|------------|-------------------|------------|
| Co(1)-O(1)  | 1.914(3) | O(1)-Co(1)-O(2)    | 108.12(13) | O(2)#2-P(1)-O(1)  | 111.98(17) |
| Co(1)-O(2)  | 1.917(3) | O(1)-Co(1)-O(3)    | 116.89(14) | O(3)#1-P(1)-O(4)  | 107.25(17) |
| Co(1)-O(3)  | 1.925(3) | O(2)-Co(1)-O(3)    | 120.58(15) | O(2)#2-P(1)-O(4)  | 104.92(16) |
| Co(1)-N(1)  | 2.026(3) | O(1)-Co(1)-N(1)    | 112.45(14) | O(1)-P(1)-O(4)    | 104.31(17) |
| P(1)-O(3)#1 | 1.497(3) | O(2)-Co(1)-N(1)    | 100.28(13) | P(1)-O(1)-Co(1)   | 126.38(19) |
| P(1)-O(2)#2 | 1.509(3) | O(3)-Co(1)-N(1)    | 96.42(13)  | P(1)#2-O(2)-Co(1) | 139.2(2)   |
| P(1)-O(1)   | 1.517(3) | O(3)#1-P(1)-O(2)#2 | 113.6(2)   | P(1)#1-O(3)-Co(1) | 141.50(19) |
| P(1)-O(4)   | 1.608(3) | O(3)#1-P(1)-O(1)   | 113.75(18) | O(2)#2-P(1)-O(1)  | 111.98(17) |

## References:

1. L. Farrugia, *J. Appl. Crystallogr.*, 1999, **32**, 837.
2. A. C. M. Young, J. C. Dewan, C. Nave and R. F. Tilton, *J. Appl. Crystallogr.*, 1993, **26**, 309.
3. Sheldrick, G. M. SHELXL-97, Program for Structure Refinement, University of Göttingen: Germany, 1997.
4. G.M. Sheldrick, *Acta Cryst.*, 2008, **A64**, 112.
